# Supplementary material for: Determination of Highly Sensitive Biological Cell Model Systems to Screen BPA-Related Health Hazards Using Pathway Studio
Source: PubMed Central journal article supplement (PMC5618558; doi:10.3390/ijms18091909), 2017-09-06
Supplement: ijms-18-01909-s001.pdf [file ijms-18-01909-s001.pdf]

# Supplementary materials: Determination of Highly Sensitive Biological Cell Model Systems to Screen BPA-Related Health Hazards using Pathway Studio

Do-Yeal Ryu, Md Saidur Rahman and Myung-Geol Pang

**Table S1.** Summary of BPA-induced differential proteome in human SW480 cells and their association with BPA-mediated diseases.

| Major disease category | Specific disease            | Overlapping entitles                               | <i>p</i> -Value |
|------------------------|-----------------------------|----------------------------------------------------|-----------------|
| Reproductive           | Implantation failure        | MTHFD1, ANXA2                                      | < 0.01          |
| Developmental          | Neurodevelopmental toxicity | G6PD, ACAT1, UQCRC2, UQCRC1, VDAC2, HNRNPK, HNRNPL | < 0.01          |
| Metabolic              | Type-2 diabetes             | UQCRC2, UQCRC1, VDAC2                              | < 0.01          |
| Cardiovascular         | -                           | UQCRC2, UQCRC1, VDAC2, MTHFD1, ANXA2               | < 0.01          |

**Table S2.** Summary of BPA-induced differential proteome in mammary gland cells and their association with BPA-mediated diseases.

| Major disease category | Specific disease            | Overlapping entitles | <i>p</i> -Value |
|------------------------|-----------------------------|----------------------|-----------------|
| Reproductive           | Implantation failure        | FGG                  | < 0.05          |
| Developmental          | Neurodevelopmental toxicity | TGM2, HPRT1, G6PD    | < 0.05          |
| Metabolic              | Type-2 diabetes             | ADIPOQ, HSPA5        | < 0.05          |
| Cardiovascular         | Cardiomyopathy              | FGG, DES, ANXA2      | < 0.05          |

**Table S3.** Summary of BPA induced differential proteome in Sertoli cells (mouse TM4 cells) and association with BPA-mediated diseases.

| <b>Major disease category</b> | <b>Specific disease</b>     | <b>Overlapping entitles</b> | <b>P-value</b> |
|-------------------------------|-----------------------------|-----------------------------|----------------|
| Reproductive                  | Implantation failure        | HSPB1                       | < 0.05         |
| Developmental                 | Neurodevelopmental toxicity | SOD1, UQCRC1, VDAC2         | < 0.05         |
| Metabolic                     | Type-2 diabetes             | UQCRC1, VDAC2, SOD1         | < 0.05         |
| Cardiovascular                | Myocardial ischemia         | UQCRC1, VDAC2, SOD1         | < 0.05         |

**Table S4.** Summary of BPA induced differential proteome in hippocampus of the rat brain and association with BPA-mediated diseases.

| <b>Major Disease Category</b> | <b>Specific Disease</b>     | <b>Overlapping entitles</b>          | <b>p-Value</b> |
|-------------------------------|-----------------------------|--------------------------------------|----------------|
| Reproductive                  | -                           | -                                    | -              |
| Developmental                 | Neurodevelopmental toxicity | GDA, PKM, TUBB2A, TUBA1B, IL9, PEBP1 | < 0.05         |
| Metabolic                     | Type-2 diabetes             | -                                    | -              |
| Cardiovascular                | -                           | DDAH1                                | < 0.05         |

**Table S5.** Summary of BPA induced differential proteome in mouse Leydig cell line (TM3) and association with BPA-mediated diseases.

| <b>Major Disease Category</b> | <b>Specific Disease</b>     | <b>Overlapping entitles</b> | <b>p-Value</b> |
|-------------------------------|-----------------------------|-----------------------------|----------------|
| Reproductive                  | -                           | -                           | -              |
| Developmental                 | Neurodevelopmental toxicity | COL1A1, CFL1, VCL           | < 0.01         |
| Metabolic                     | Type-2 diabetes             | AKR1B1                      | < 0.05         |
| Cardiovascular                | -                           | -                           | -              |

**Table S6.** Summary of BPA induced differential proteome in mouse prefrontal cortex and association with BPA-mediated diseases.

| <b>Major Disease Category</b> | <b>Specific Disease</b>     | <b>Overlapping entitles</b> | <b>p-Value</b> |
|-------------------------------|-----------------------------|-----------------------------|----------------|
| Reproductive                  | -                           | -                           | -              |
| Developmental                 | Neurodevelopmental toxicity | ATP6V1B1                    | < 0.05         |
| Metabolic                     | Type-2 diabetes             | ATP6V1B1                    | < 0.05         |
| Cardiovascular                | Vasospasm                   | ATP6V1B1                    | < 0.05         |

**Table S7.** Summary of BPA induced differential proteome in rat serum and association with BPA-mediated diseases.

| <b>Major Disease Category</b> | <b>Specific Disease</b>     | <b>Overlapping entitles</b> | <b>p-Value</b> |
|-------------------------------|-----------------------------|-----------------------------|----------------|
| Reproductive                  | -                           | -                           | -              |
| Developmental                 | Neurodevelopmental toxicity | LBR, SMC3                   | < 0.05         |
| Metabolic                     | Type-2 diabetes             | ITGA6, DLK1                 | < 0.05         |
| Cardiovascular                | -                           | -                           | -              |

**Table S8.** Summary of BPA induced differential proteome in zebrafish brain and association with BPA-mediated diseases.

| <b>Major Disease Category</b> | <b>Specific Disease</b>     | <b>Overlapping entitles</b> | <b>p-Value</b> |
|-------------------------------|-----------------------------|-----------------------------|----------------|
| Reproductive                  | -                           | -                           | -              |
| Developmental                 | Neurodevelopmental toxicity | ATP2A2, SLC25A4, IARS       | < 0.05         |
| Metabolic                     | Type-2 diabetes             | ACTN2, ATP2A2, SLC25A4      | < 0.01         |
| Cardiovascular                | Cardiomyopathy              | ACTN2, ATP2A2, SLC25A4      | < 0.01         |

**Table S9.** Summary of BPA induced differential proteome in thyroid of female mice and association with BPA-mediated diseases.

| <b>Major Disease Category</b> | <b>Specific Disease</b>     | <b>Overlapping entitles</b> | <b><i>p</i>-Value</b> |
|-------------------------------|-----------------------------|-----------------------------|-----------------------|
| Reproductive                  | -                           | -                           | -                     |
| Developmental                 | Neurodevelopmental toxicity | VCP, HSPA5                  | < 0.01                |
| Metabolic                     | Type-2 diabetes             | HSPA5                       | < 0.05                |
| Cardiovascular                | -                           | -                           | -                     |
